# Supplementary material
Source: PubMed Central journal article supplement (PMC3145104)
Supplement: NIHMS28563-supplement-TableS2.pdf [file NIHMS28563-supplement-TableS2.pdf]

**Characterization of two *in vivo*-expressed methyltransferases of the *Mycobacterium tuberculosis* complex: antigenicity and genetic regulation**

Paul Golby, Javier Nunez, Paul J. Cockle, Katie Ewer, Karen Logan, Philip Hogarth, H. Martin Vordermeier, Jason Hinds, R. Glyn Hewinson and Stephen V. Gordon

*Microbiology* (2008), **154**, 1059–1067

**Table S2.** Primers used in plasmid construction

| <b>Primer</b> | <b>Sequence</b>                |
|---------------|--------------------------------|
| Mb1440c5'F1   | CCGGATCCCTGCGGGCAGCGAAATATTG   |
| Mb1440c5'R    | CCGGATCCACCGCCAGTCGCTTAAGTAG   |
| Mb1438c3'F    | CCCTGCAGGGTACGGCGGTGATTACGTC   |
| Mb1438c3'R1   | CCTCTAGATACGTGAGTGGCCTGTTTCG   |
| Mb1440c5'F2   | GCTGGCTCTGGCAATATTTC           |
| Mb1438c3'R2   | CAGAGGTATTCGCGACAAAG           |
| hygF          | TGTCCGCACCGCGGTCAGGC           |
| fmtR1         | GATCGGCGATGCCATCCAGC           |
| Rv1405cF1     | CCCGGATCCTAGCGGCCGAGCCCGTGTTCG |
| Rv1405cR1     | CCCGGATCCGAGAAGTGCAGGTTGACCCA  |
| Rv1403cF1     | CCCGGATCCGCGGTCATCAGGATGTTGC   |
| Rv1403cR1     | CCCGGATCCGACCTGACGGACGACATCTC  |
| Rv1404F1      | CCCTCTAGACAGTCCGGCTGCCGCAGCAC  |
| Rv1404R1      | CCCAAGCTTGGCGGGCAATCCGGCCTGTG  |
| priAF         | CCCAAGCTTCTGCATATCGGGTAAACGGA  |
| Rv1405cR3     | CCCAAGCTTCTCACCGCCGAAAAGCGCTG  |
| Rv1405cF2     | CCCAAGCTTTTGCCCGCCTCAGCGCTTTT  |
| fmtR2         | CCCAAGCTTGAGAAGTGCAGGTTGACCCA  |
